# Supplementary figures and images for: Scent of a break-up: phylogeography and reproductive trait divergences in the red-tailed bumblebee (Bombus lapidarius)
Source: Springer Nature journal article supplement (doi:10.1186/1471-2148-13-263), 2013-01-01

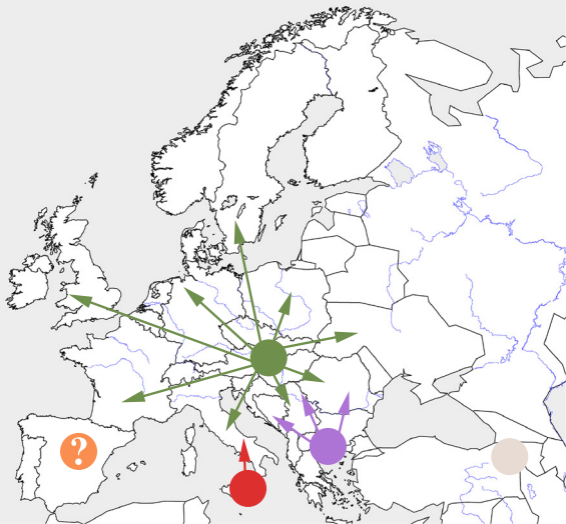

Supplement: 12862_2013_2496_MOESM11_ESM.pdf [file 12862_2013_2496_MOESM11_ESM.pdf]
